1 **The iron-dopamine D1 coupling modulates neural signatures of**  
2 **working memory across adulthood**

3 Jonatan Gustavsson<sup>1</sup>, Jarkko Johansson<sup>2</sup>, Farshad Falahati<sup>1</sup>, Micael Andersson<sup>4</sup>, Goran Papenberg<sup>1</sup>,

4 Bárbara Avelar-Pereira<sup>1</sup>, Lars Bäckman<sup>1</sup>, Grégoria Kalpouzos\*<sup>1</sup>, Alireza Salami\*<sup>1,3,4</sup>

5 <sup>1</sup>Aging Research Center, Karolinska Institutet and Stockholm University, Sweden. <sup>2</sup>Umeå University,

6 Faculty of Medicine, Department of Radiation Sciences, Sweden. <sup>3</sup>Wallenberg Center for Molecular

7 Medicine at Umeå University <sup>4</sup> Department of Integrative Medical Biology, Umeå University, Umeå,

8 Sweden

9 \*Authors share the position as last authors.

10

## 11 **1 Abstract**

12 Brain iron overload and decreased integrity of the dopaminergic system have been independently  
13 reported as brain substrates of cognitive decline in aging. Dopamine (DA), and iron are co-localized in  
14 high concentrations in the striatum and prefrontal cortex (PFC), but follow opposing age-related  
15 trajectories across the lifespan. DA contributes to cellular iron homeostasis and the activation of D1-  
16 like DA receptors (D1DR) alleviates oxidative stress-induced inflammatory responses, suggesting a  
17 mutual interaction between these two fundamental components. Still, a direct in-vivo study testing  
18 the iron-D1DR relationship and their interactions on brain function and cognition across the lifespan is  
19 rare. Using PET and MRI data from the DyNAMiC study (n=180, age=20-79, %50 female), we showed  
20 that elevated iron content was related to lower D1DRs in DLPFC, but not in striatum, suggesting that  
21 dopamine-rich regions are less susceptible to elevated iron. Critically, older individuals with elevated  
22 iron and lower D1DR exhibited less frontoparietal activations during the most demanding task, which  
23 in turn was related to poorer working-memory performance. Together, our findings suggest that the  
24 combination of elevated iron load and reduced D1DR contribute to disturbed PFC-related circuits in  
25 older age, and thus may be targeted as two modifiable factors for future intervention.

26 Keywords: Dopamine, Iron, Working memory, Age, BOLD

## 27 **2 Introduction**

28 Aging is associated with cognitive decline (Gorbach et al., 2017; Salthouse, 2012) and concomitant  
29 alterations in structural, functional, and molecular properties of the brain (Andrews-Hanna et al., 2007;  
30 Bäckman et al., 2000; Gorbach et al., 2017; Zimmerman et al., 2006). Elevated iron content and  
31 decreased integrity of the dopaminergic system are typically reported as independent brain substrates  
32 of age-related cognitive decline (Bäckman et al., 2006, 2011; Cools & D'Esposito, 2011; Daugherty et  
33 al., 2015; Gustavsson et al., 2022; Hallgren & Sourander, 1958; Kalpouzos, 2018; Landau et al., 2009;  
34 Nyberg, Andersson, et al., 2009; Salami et al., 2019). Intracellular non-heme iron is involved in several  
35 fundamental neurobiological processes, including dopamine (DA) metabolism (Hare & Double, 2016;

36 Mills et al., 2010). More specifically, iron is a cofactor of tyrosine hydroxylase during DA synthesis,  
37 indicating a critical role of iron in DA metabolism as well as in the development of the dopaminergic  
38 system (Erikson et al., 2001; Ortega et al., 2007; Unger et al., 2014; Zucca et al., 2017).

39 Iron is stored in the ferritin protein which keeps it from harming brain cells and is released upon  
40 metabolic demand. However, unbound iron accumulates with advancing aging and exerts detrimental  
41 effects on cellular integrity. Elevated iron content contributes to poorer myelin integrity (Steiger et al.,  
42 2016) and grey-matter atrophy (Daugherty & Raz, 2015, 2016), as well as altered frontostriatal activity  
43 (Kalpouzos et al., 2017; Rodrigue et al., 2020; Salami et al., 2021) along with disrupted functional  
44 connectivity in aging (Salami et al., 2018). Similar to consequences of elevated iron in aging, disruption  
45 of the DA system contributes to age-related neurocognitive impairment (Bäckman et al., 2006, 2011;  
46 Cools & D'Esposito, 2011; Landau et al., 2009; Nyberg, Dahlin, et al., 2009; Rieckmann et al., 2011;  
47 Salami et al., 2019). Given DA and iron are co-localized in high concentrations in the striatum, age-  
48 related iron dyshomeostasis combined with disturbance of the DA system may become harmful for  
49 brain integrity and cognition. Direct in-vivo studies testing the synergistic effects between the  
50 dopaminergic system and iron on brain function and cognition in aging are rare.

51 Past studies suggest that iron may cause neurotoxicity through DA oxidation, which may in turn  
52 contribute to loss of dopaminergic neurons (Hald & Lotharius, 2005; Hare & Double, 2016; Youdim et  
53 al., 1993; Zucca et al., 2017). Animal studies have demonstrated that iron-induced damage causing DA  
54 depletion (Poetini et al., 2018) and deterioration of dopaminergic cells (Kaur et al., 2003) could be  
55 restored after iron chelation. In contrast, a longitudinal study showed that dopaminergic cell death  
56 precedes iron elevation in parkinsonian monkey (He et al., 2003). A study with young, middle-aged,  
57 and older rhesus monkeys reported an association between iron and stimulus-evoked levels of DA  
58 (Cass et al., 2007), with older monkeys exhibiting more iron accumulation and less DA release.  
59 Although it remains unclear whether elevated iron is the cause or consequence of DA degeneration, it

60 is relatively well acknowledged in animal studies that these two key chemical components of the brain  
61 interact with each other (Hare & Double, 2016).

62 As opposed to ample animal studies on iron-DA coupling, evidence for such an association across the  
63 adult lifespan in humans is scarce. A recent longitudinal study showed that developmental changes in  
64 pre-synaptic, but not post-synaptic, DA receptors were positively associated with iron accumulation  
65 through adolescence and young adulthood (Larsen et al., 2020). Still, iron and DA play ambivalent roles  
66 during early and later adulthood (Johansson et al., 2022; Kalpouzos et al., 2017; Salami et al., 2021).  
67 Recent work showed that older individuals with genetic predisposition for lower DA (by proxy of the  
68 *COMT* Val158Met genetic polymorphism) accumulated more iron in the dorsolateral prefrontal cortex  
69 (DLPFC) and striatum over 3 years (Gustavsson et al., 2022). Postsynaptic DA markers, particularly DA  
70 D1-like receptor (D1DRs) which are the most abundantly expressed receptor subtypes, are among the  
71 most age-sensitive DA systems (Karrer et al., 2019). Moreover, the activation of D1 and D2 receptors  
72 alleviates oxidative stress-induced inflammatory responses (Shao et al., 2013; Yan et al., 2015; Zhu et  
73 al., 2018). Hence, with diminished DADRs, the capacity of the protective response counteracting  
74 oxidative stress and neuroinflammation due to iron overload is lessened, and may lead to increased  
75 damage and ferroptosis (Hald & Lotharius, 2005).

76 Motivated by the lack of human studies, we investigated the relationship between dopaminergic  
77 receptors and iron content, and their interactions on brain function and cognition. Using the largest  
78 D1DR dataset across the world, we studied 180 healthy individuals (20-79 years old) who underwent  
79 D1DR Positron Emission Tomography (PET) assessment using [<sup>11</sup>C]SCH23390, iron approximation made  
80 with magnetic resonance imaging (MRI) based quantitative susceptibility mapping (QSM;  
81 (Langkammer et al., 2012)), and functional magnetic resonance imaging (fMRI) while performing a  
82 working-memory task. We first examined regional variation in the link between D1DR and iron content  
83 with the hypothesis that greater iron content is related to lower D1DR, with a possible interaction with  
84 age (C.f. Salami et al., 2021; Kalpouzos et al., 2018). We targeted DLPFC and striatum, because of

85 abundantly expressed D1DR (Shohamy & Adcock, 2010), pronounced age-related D1DR differences  
86 (Karrer et al., 2017), and association between *COMT* polymorphism (i.e., a dopaminergic gene) and  
87 iron accumulation reported in these regions (Gustavsson et al., 2022). Given the association of iron  
88 and DA to neural circuits of working memory (c.f., Salami et al., 2021; Salami et al., 2019), we predicted  
89 an interactive effect of iron and D1DR on load-dependent BOLD modulation and working memory  
90 processing (Gustavsson et al., 2022; Spence et al., 2020). To this end, we applied multivariate partial-  
91 least squares (PLS; ((McIntosh & Lobaugh, 2004)) which enables a simultaneous analysis of iron  
92 content, D1DR, age, on BOLD associations across all task conditions in a data-driven fashion. If these  
93 variables are simultaneously related to neural circuits of WM, PLS should reveal a single network  
94 showing that older individuals with elevated iron and decreased D1DR (i.e., toxic iron-DA coupling)  
95 exhibit lower task-related BOLD-response, particularly within the frontoparietal network. However, if  
96 D1DR and iron differentially modulate BOLD response (c.f., Salami et al., 2019; Salami et al., 2021), PLS  
97 should reveal different networks.

## 98 **2. Results**

### 99 **2.1 Demographics.**

100 Demographic information along with data on body mass index (BMI), brain volumes, D1DR, and N-back  
101 performance are presented in Table 1.

102

103  
104  
105  
106  
107  
108  
109  
110  
111  
112  
113  
114  
115  
116  
117  
118  
119  
120  
121  
122  
123  
124

| <b>Table 1. Participant characteristics</b> |                              |             |           |
|---------------------------------------------|------------------------------|-------------|-----------|
|                                             |                              | <b>Mean</b> | <b>SD</b> |
|                                             | N (Women)                    | 162 (79)    |           |
|                                             | Age                          | 50          | 17        |
|                                             | Age range                    | 20-78       |           |
|                                             | MMSE                         | 28.8        | 1.1       |
|                                             | BMI                          | 25.2        | 3.9       |
|                                             | Education                    | 15          | 3.4       |
|                                             | Volume <sup>a</sup>          |             |           |
|                                             | DLPFC                        | 20478       | 2696      |
|                                             | Striatum                     | 11473       | 1282      |
|                                             | Iron <sup>b</sup>            |             |           |
|                                             | DLPFC                        | 0.0430      | 0.0140    |
|                                             | Striatum                     | 0.0998      | 0.0286    |
|                                             | D1DR                         |             |           |
|                                             | DLPFC                        | 0.3582      | 0.0690    |
|                                             | Striatum                     | 1.6130      | 0.2182    |
|                                             | WM performance               |             |           |
|                                             | 1-back accuracy <sup>c</sup> | 75.18       | 6.65      |
|                                             | 1-back (H-FA) <sup>d</sup>   | 0.86        |           |
|                                             | 2-back accuracy              | 60.99       | 8.77      |
|                                             | 2-back (H-FA)                | 0.72        |           |
|                                             | 3-back accuracy              | 48.10       | 9.57      |
|                                             | 3-back (H-FA)                | 0.59        |           |

*Note. MMSE = Mini Mental State Examination, DLPFC = Dorsolateral prefrontal cortex, SD = Standard deviation.*  
<sup>a</sup> Volume (mL) adjusted for total intracranial volume  
<sup>b</sup> Approximation of iron, based on susceptibility in parts per million  
<sup>c</sup> Accuracy calculated as the sum of correct responses  
<sup>d</sup> Proportion of false alarms (FA) subtracted from proportion of hits (H)

The MANCOVA conducted on N-Back performance showed a significant main effect on load conditions ( $F_{2,155} = 228.24, p < 0.001, \text{Wilk's } \Lambda = 0.253, \text{partial } \eta^2 = 0.747$ ), and an age-group effect on load conditions ( $F_{4,310} = 9.43, p < 0.001, \text{Wilk's } \Lambda = 0.795, \text{partial } \eta^2 = 0.108$ ). Post-hoc analysis for the lowest WM load (1-back) showed that the older participants performed less accurately compared to both middle-aged ( $t_{89} = -3.974, p < 0.001$ ) and younger participants ( $t_{71} = -5.707, p < 0.001$ ). There was no significant difference between younger and middle-aged participants ( $p = 0.07$ ). For 2-back, older participants performed significantly poorer compared to both middle-aged ( $t_{105} = -4.015, p < 0.001$ ) and younger participants ( $t_{85} = -8.905, p < 0.001$ ). Middle-aged participants performed significantly

125 poorer compared to younger participants ( $t_{98} = -4.176$ ,  $p < 0.001$ ). Lastly, for highest WM load (3-back),  
126 older participants performed significantly poorer compared to both middle-aged ( $t_{105} = -5.300$ ,  $p <$   
127  $0.001$ ) and younger participants ( $t_{102} = -7.950$ ,  $p < 0.001$ ). Middle-aged participants performed  
128 significantly poorer compared to younger participants ( $t_{105} = -2.921$ ,  $p = 0.004$ ).

## 129 **2.2 Iron content in DLPFC, but not in striatum, was negatively associated with D1DR**

130 Both striatal and DLPFC iron increased with advancing age (striatum:  $r = 0.551$ ,  $p < 0.001$ ; DLPFC:  $r =$   
131  $0.244$ ,  $p = 0.002$ ). D1DRs in both regions decreased with advancing age (striatum:  $r = -0.62$ ,  $p < 0.001$ ;  
132 DLPFC:  $r = -0.565$ ,  $p < 0.001$ ).

133 The partial correlation analysis for iron content and D1DR in DLPFC showed a significant negative  
134 association across the whole sample ( $r = -0.272$ ,  $p < 0.001$ ), suggesting that greater iron content was  
135 linked to lower D1DR (Fig. 1B). Further group level analyses revealed that this correlation was similarly  
136 expressed across different age groups (Younger:  $r = -0.10$ ,  $p = 0.48$ ; Middle-aged:  $r = -0.30$ ,  $p = 0.026$ ;  
137 Older:  $r = -0.37$ ,  $p = 0.006$ ). However, striatal iron content was unrelated to D1DR across the whole  
138 sample ( $r = -0.101$ ,  $p = 0.20$ ; supplementary materials, Fig. 1B). No significant association was observed  
139 within each age groups ( $P_s > 0.05$ ), except for a trend-level link in the older individuals ( $r = -0.24$ ,  $p =$   
140  $0.08$ ).

141

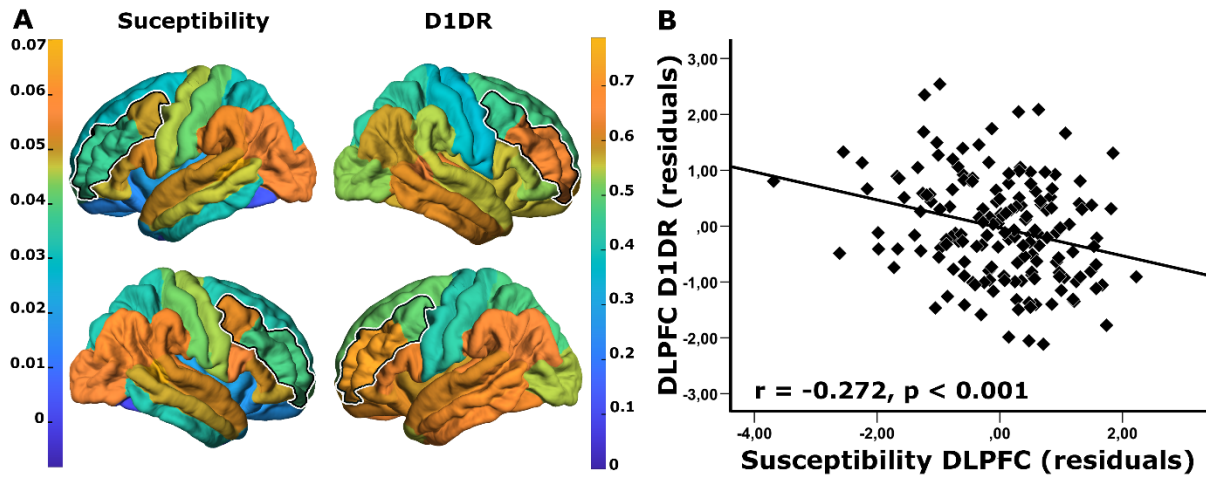

142

143 **Figure 1.** The relationship between iron content and D1DR in dorsolateral prefrontal cortex. **(A)**  
144 Surface map representing distribution of cortical iron (susceptibility in parts per million; left column)  
145 and D1DR ( $[^{11}\text{C}]\text{SCH23390 BP}_{\text{ND}}$ ; right column) with dorsolateral prefrontal cortex (DLPFC) outlined.  
146 **(B)** Scatterplot depicting the association between greater iron content and lower D1DR in DLPFC. All  
147 values are z-transformed residuals adjusting for age.

148

### 149 **2.3 Iron-D1DR couplings in DLPFC modulates WM-related BOLD in a load-dependent fashion**

150 Given the iron-D1DR link in DLPFC, we next investigated whether iron-D1DR coupling modulated  
151 neural correlates of PFC-related function across the adult lifespan. We used behavioural PLS to assess  
152 the presence of multivariate spatial patterns of task-related BOLD response dependent on age, iron  
153 content, and D1DR across load conditions during N-back working memory task. The analysis identified  
154 two significant latent variables (LVs). LV1 represented a brain-wide network with increased activation  
155 in older individuals in a load-independent fashion. This network was largely unrelated to D1DR or iron  
156 in DLPFC (supplementary materials 5.1.2, Table 1, Fig 2).

157 The second LV represented the canonical WM network (c.f. Nagel et al., 2009; Salami et al., 2018). This  
158 LV (permuted  $p = 0.02$ , 17.97% of cross-block covariance: Fig. 3A) demonstrated that older individuals  
159 with elevated iron content and lower D1DR in DLPFC exhibited lower BOLD response in the  
160 frontoparietal network during 3-back (Fig. 3B). In contrast, higher BOLD response in the frontoparietal



161 network during 1-back was associated with older age and lower D1DR in DLPFC, but not with iron  
162 content. For 2-back, no associations were considered reliable as the CI:s overlapped with zero (Fig. 3B).  
163 As opposed to the frontoparietal WM network, the default-mode network (Fig. 3A (Blue areas);  
164 supplementary Table 2) was less deactivated during 3-back in older individuals with higher iron content  
165 and lower D1DR in DLPFC. Taken together, these results revealed that iron-D1DR coupling modulates  
166 neural correlates of the working memory in a load-dependent fashion.

167

168

169

170

171

172

173

174

175

176

177

178

179

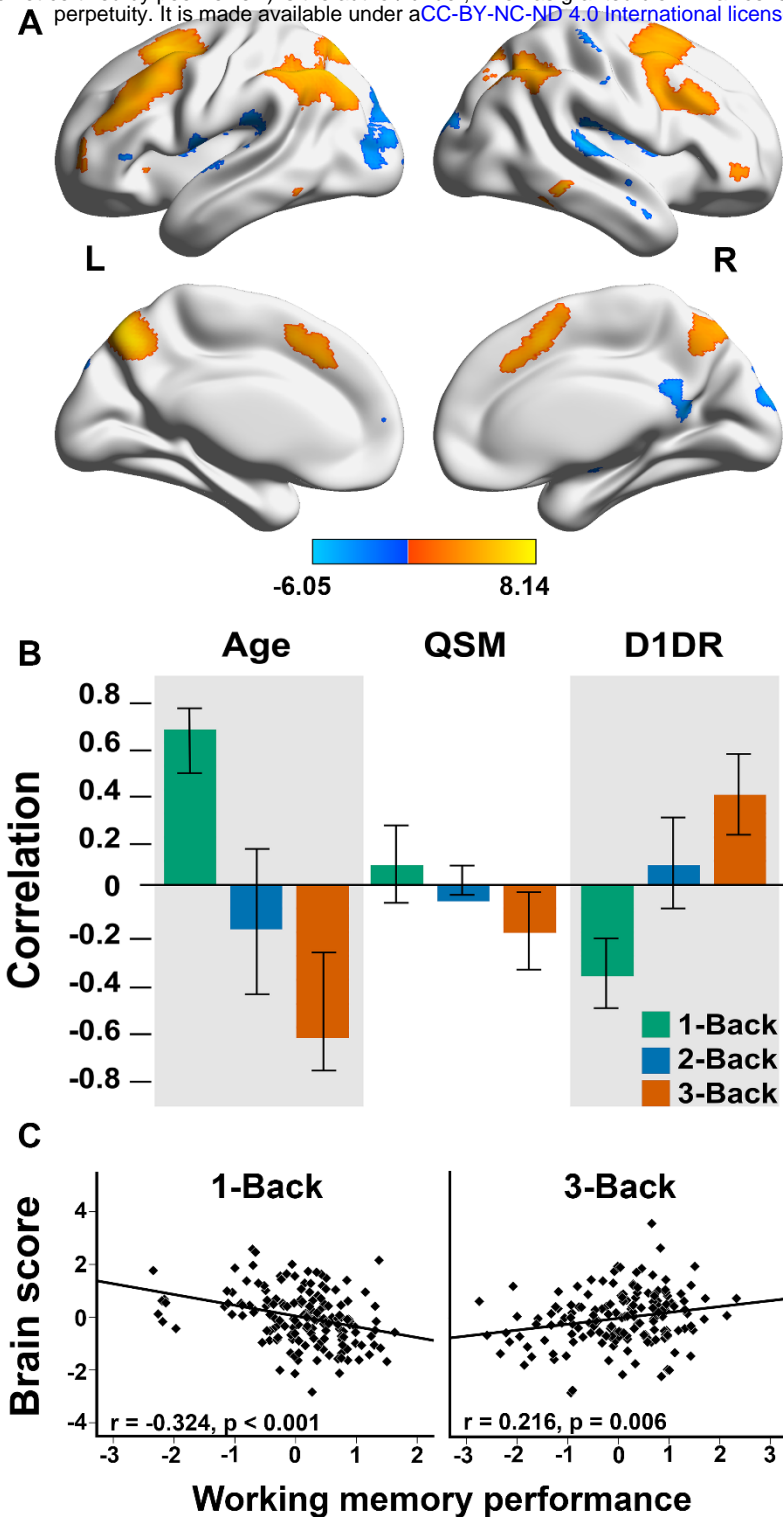

180 **Figure 3.** Multivariate relationship of BOLD response patterns during working-memory task identified  
181 by task PLS. **A)** The regions depicted in a yellow colour mainly correspond to the frontoparietal  
182 network, whereas the blue colour mainly represents the default-mode network. The frontoparietal  
183 network showed greater activation in correspondence to the behavioural measures across different  
184 task conditions, whereas the default-mode network showed greater deactivation (i.e., less  
185 activation). **B)** BOLD association across age, iron content (QSM), and D1DR. Interpretation of the  
186 figure should be as reliable positive and negative associations of activation (BOLD response) when  
187 the confidence intervals (CI:s) do not overlap with zero. As the frontoparietal network displayed  
188 increased activation, a positive association is interpreted as greater activation, whereas a negative

189 association is interpreted as less activation. For the default-mode network the opposite applies. **C)**  
190 Greater activation was associated with poorer performance during 1-back, but greater performance  
191 during 3-back. All values are z-transformed residuals adjusting for age.

192

#### 193 **2.4 Load-dependent BOLD response is differentially associated with task performance.**

194 We have shown that increasing age was concomitant with increased and decreased activations within  
195 the frontoparietal network during 1-back and 3-back, respectively. We next tested the relationship of  
196 brain activation in relation to task performance. The brain score during 1-back was negatively  
197 associated with 1-back performance ( $r = -0.324$ ,  $p < 0.001$ ; Fig. 3C), but positively with 3-back ( $r = 0.216$ ,  
198  $p = 0.006$ ; Fig. 3C). No significant association was observed during 2-back ( $r = 0.05$ ,  $p=0.4$ ). Taken  
199 together, our results suggest that less frontoparietal activity during 3-back as well as greater  
200 frontoparietal activity during 1-back are associated with less efficient working memory function.

#### 201 **2.5 Control analyses**

202 To confirm that the results obtained from the partial correlation analyses were not due to confounding  
203 variables, we performed additional analyses in which we controlled for sex, education, and regional  
204 grey-matter volume. The inclusion of the additional variables did not result in a noticeable change of  
205 the outcome and all the patterns remained consistent. A full description of the results is given in the  
206 supplementary results.

#### 207 **3. Discussion**

208 In this study, we provide first in-vivo evidence for an association between D1DR and brain iron across  
209 the adult lifespan, and how iron-D1DR synergy may contribute to disturbed brain responses during  
210 WM task performance across the lifespan. The main findings were that greater iron content was  
211 associated with lower D1DR in DLPFC, but not in striatum, across the adult lifespan. We also found that  
212 older individuals with elevated iron content and lower D1DR in DLPFC – a presumably deleterious  
213 synergy – exhibited lower frontoparietal activity along with less deactivation of the DMN during high

214 demand condition and in turn poorer WM performance. Although the associations revealed by these  
215 data are cross-sectional, a plausible interpretation is that elevated iron and lower D1DR together form  
216 a toxic couple (c.f. Hare & Double, 2016), which would contribute to reduced network dynamics and  
217 impaired WM processing.

218 A key finding of the present study is the association between higher iron content and lower D1DR in  
219 DLPFC across the adult lifespan. The exact mechanism underlying the association between iron content  
220 and DA receptors is poorly understood. The dopaminergic system is important to cellular iron  
221 homeostasis, as documented in *in vitro* studies (Dichtl et al., 2018; Liu et al., 2021). Supporting this  
222 idea, we recently demonstrated that older adults with genetic predisposition for lower DA levels  
223 accumulated more iron in DLPFC and striatum over time compared to individuals with presumably  
224 higher DA levels (Gustavsson et al., 2022). Age-related differences in pre- and postsynaptic DA markers  
225 (Bäckman et al., 2006, 2010) may also contribute to iron dyshomeostasis in aging, resulting in  
226 disruption of transportation of iron via transferrin and storage in the ferritin protein (Ward et al.,  
227 2014). Disruption of iron handling may lead to increase of ferrous iron, which triggers oxidative stress,  
228 neuroinflammation, and cell loss due to ferroptosis (Daugherty et al., 2015; Mazhar et al., 2021; Salami  
229 et al., 2021). The activation of D1 and D2/3 receptors alleviates oxidative stress-induced inflammatory  
230 responses (Shao et al., 2013; Yan et al., 2015; Zhu et al., 2018). However, whether age-related loss of  
231 DA receptors leads to an iron-related increase of oxidative stress and ferroptosis, or whether an age-  
232 related increase of iron causes loss of DA receptor cells can only be determined in a longitudinal  
233 setting.

234 We did not observe any significant association between iron and D1DR in striatum, except for a trend-  
235 level negative association in older age. The reason for these regional variations is unclear. One  
236 possibility is that, as D1DR are more expressed in striatum compared to cortex (Shohamy & Adcock,  
237 2010), striatal regions are less vulnerable or better at attenuating the damage from higher iron  
238 content. If too many receptors diminishes, or the threshold of the capacity for dealing with oxidative

239 stress is exceeded, the iron-induced damage to the cells may lead to ferroptosis (Lillig et al., 2008). This  
240 concords well with Parkinson's Disease studies reporting regional variations in synuclein pathology  
241 despite brain-wide iron accumulation (McCann et al., 2016), suggesting that additional factors may  
242 contribute to iron serving a pathological role.

243 The multivariate PLS analysis revealed that in older age the combination of higher iron and lower  
244 D1DR within DLPFC was related to high frontoparietal recruitment during low-demanding tasks along  
245 with weak frontoparietal upregulation at higher task demand, which in turn was associated with  
246 poorer working memory performance. These results concord with the Compensation-Related  
247 Utilization of Neural Circuits Hypothesis (CRUNCH; (Cappell et al., 2010; Mattay et al., 2006; Nyberg  
248 et al., 2014; Reuter-Lorenz & Cappell, 2008; Schneider-Garces et al., 2010)), which postulates that  
249 neural activity increases at low demanding task-levels in older adults compared to younger adults,  
250 but is reduced at more demanding levels.

251 The unique and shared contributions of iron content and neuroinflammation to astrocytic dysfunction  
252 in the neurovascular coupling has been proposed to account for the reduced BOLD response  
253 (Kalpouzos et al., 2017; Salami et al., 2018, 2021). Higher iron content has been related to inflammation  
254 (Haider, 2015; Salami et al., 2021), which can be detrimental to cells during prolonged periods (Hald &  
255 Lotharius, 2005; Zecca et al., 2004), thus contributing to astrocytic dysfunction. In vitro studies have  
256 demonstrated that DA receptors activation may alleviate and suppress neuroinflammation (Liu et al.,  
257 2021; Shao et al., 2013; Yan et al., 2015). A more efficient dopaminergic system (e.g., manifested by  
258 greater receptor availability) protect against negative effects of iron and neuroinflammation on brain  
259 function. In support of this notion, a past study showed that age-related D1DR alteration alone may  
260 contribute to less efficient engagement of working memory circuits (Bäckman et al., 2011). Relatedly,  
261 the importance of DA for the frontoparietal BOLD response has been further demonstrated through  
262 pharmacological administration of a dopaminergic antagonist, leading to poorer working-memory  
263 performance (Fischer et al., 2010). Our results add novel contribution to the previous work, by showing

264 that the combination of elevated iron and D1DR reduction in DLPFC in aging, possibly reflecting  
265 synergistic iron-D1DR effects, exerts a deleterious effect in neural circuits of WM. Furthermore, during  
266 the most demanding WM condition (3-back), lower activation in the frontoparietal network was  
267 related to worse performance, in concordance with previous reports (Salami et al., 2021). Longitudinal  
268 data are needed to identify the primary mechanism of disturbed working memory circuit in older age.  
269 Our study is the first to link regional iron content to DA receptor availability, by showing that greater  
270 iron content is related to lower D1DR. Critically, an interplay between age-related elevated iron  
271 content and diminished D1 receptor availability may provide a mechanistic understanding of how iron-  
272 DA coupling may exert deleterious effects on neural function and ultimately cognition. Elevated brain  
273 iron has been implicated in several neurodegenerative disorders, including Parkinson's disease, which  
274 is characterized by loss of dopaminergic cells (Ward et al., 2014). Thus, the observed findings have  
275 implications for better understanding the mechanisms behind DA-related neurodegeneration.

## 276 **4 Materials and methods**

277 This study uses data from the DopamiNe Age Connectome Cognition (DyNAMiC) project approved by  
278 the Umeå University Regional Ethical Board. All participants signed informed consent prior to data  
279 collection (for details about DyNAMiC, see Nordin et al., 2022).

### 280 **4.1 Participants**

281 One-hundred and eighty adults (mean age  $49.8 \pm 17.4$  years; range 20-78; 90 females) from Umeå,  
282 Sweden, were recruited to participate in the project and underwent the full protocol, including  
283 cognitive testing, MRI, and PET assessments. All participants were native Swedish speakers, right-  
284 handed, and had no history of neurological illnesses. Of the sample of 180 participants, 3 dropped out  
285 of PET scanning, 4 were excluded due to incidental brain abnormalities, 3 due to failed reconstruction  
286 of QSM images. Additionally, brain and behavioural data were screened for univariate and multivariate  
287 outliers. Univariate outliers were defined as values greater or less than 3.29 SD from the mean  
288 (Tabachnick & Fidell, 2013) and excluded as pairwise deletions per ROIs and modality. Multivariate

289 outliers were identified according to Mahalanobis distance ( $p < 0.001$ ; Tabachnick & Fidell, 2013). As a  
290 result, five participants were identified as univariate outliers on their iron ( $n=3$ ) or D1DR ( $n=2$ ) values,  
291 and three were multivariate outliers. Thus, data from 162 individuals were used in the analyses  
292 involving iron content and D1DR. Furthermore, three outliers were identified based on their online  
293 WM performance and excluded from analyses.

#### 294 **4.2 Neuroimaging acquisition and preprocessing**

295 Participants underwent positron emission tomography on a Discovery 690 PET/CT scanner (General  
296 Electric) and MRI on a Discovery MR750 3.0 T scanner (General Electric) equipped with a 32-channel  
297 phased-array head coil at two separate occasions at Umeå University Hospital.

298 *PET acquisition.* PET was conducted to assess whole-brain D1DR using radioligand [ $^{11}\text{C}$ ]SCH23390 at  
299 rest (for details see Nordin et al., 2022). The scanning session started with a low-dose CT image,  
300 followed by an intravenous bolus injection of the radioligand. Participants were instructed to lay still  
301 and stay awake with eyes open. An individually fitted thermoplastic mask was attached to the bed  
302 surface during scanning to minimize head movement.

303 *Structural MR acquisition.* High-resolution anatomical T1-weighted images were acquired using 3D  
304 fast-spoiled gradient echo sequence with the following parameters: 176 sagittal slices, slice thickness  
305 = 1 mm, voxel size  $0.49 \times 0.49 \times 1 \text{ mm}^3$ , repetition time (TR) = 8.2 ms, echo time (TE) = 3.2 ms, flip angle  
306 =  $12^\circ$ , field of view (FOV) =  $250 \times 250 \text{ mm}$ , no spacing.

307 *Iron acquisition.* Images for iron estimation was obtained using a 3D multi-echo gradient-recalled echo  
308 sequence (meGRE). The parameters were as follows: 124 axial slices, voxel size  $1 \times 1 \times 1.2 \text{ mm}^3$ , TR =  
309 31 ms, flip angle =  $17^\circ$ , FOV =  $256 \times 256 \text{ mm}$ , no spacing. The first TE was 1.78 ms followed by seven  
310 additional TEs with a 2.87 ms interval.

311 *Functional MR acquisition.* The functional images were sampled using single-shot multiband EPI  
312 sequence with 37 axial slices, voxel size  $1.95 \times 1.95 \times 3.9 \text{ mm}^3$ , 0.5 mm spacing, TR = 2.000 ms, TE = 30

313 ms, flip angle = 80°, and FOV = 250 × 250 mm. Ten dummy scans were collected at the start of the  
314 sequence.

315 *In-scanner working memory task.* A numerical N-back task was administered in the scanner (Salami et  
316 al., 2018). A sequence of single numbers appeared on the screen for 1.5s, with an interstimulus interval  
317 of 0.5s. During every item presentation, subjects indicated whether the digit on the screen was the  
318 same as the one shown 1, 2, or 3 digits back by pressing one of the two adjacent buttons with the index  
319 (Yes response) or middle finger (No response). Each working-memory load condition (1-, 2-, and 3-  
320 back) was presented over nine blocks in random order (interblock interval, 22 s) with each block  
321 consisting of 10 trials. For every block, 10 trials were performed with four matches (requiring a “yes”  
322 response) and six nonmatches (requiring a “no” response). The N-back blocks were counterbalanced  
323 and trial sequence was the same for all participants. The maximum score for each condition was 81,  
324 72, 63, respectively. Performance was calculated as an error-adjusted discrimination score by  
325 subtracting the proportion of false alarms (i.e., a wrong answer judged to be correct, or, in other terms,  
326 answering Yes, when the correct answer is No) from the proportion of correct hits (i.e., answering Yes  
327 when the correct answer is Yes).

### 328 *PET processing*

329 PET data obtained with [<sup>11</sup>C]SCH23390 was processed with the following steps: To estimate receptor  
330 availability (i.e., D1DR) in targeted regions, binding potential relative to non-displaceable binding in a  
331 reference region (BP<sub>ND</sub>; Innis et al., 2007) was used with cerebellum as reference. The processing of  
332 the PET data included correction for head movement by using frame-to-frame image co-registration,  
333 and co-registered with T1-weighted MRI data with re-slicing to MRI voxel size using Statistical  
334 Parametric Mapping (SPM12: Wellcome Trust Centre for Neuroimaging,  
335 <http://www.fil.ion.ucl.ac.uk/spm/>). To model the regional time-activity course (TAC) data we used  
336 simplified reference tissue model (SRTM; Lammertsma & Hume, 1996).

### 337 *MRI processing*



338 *Quantitative susceptibility mapping.* Approximation of iron content was inferred from susceptibility  
339 values derived from QSM images. Morphology-enabled dipole inversion (MEDI; T. Liu et al., 2011) is a  
340 method for QSM estimation that selects the solution that minimizes the discrepancy in the number of  
341 voxels belonging to edges between the susceptibility image and the magnitude image. Here, we used  
342 the recommended nonlinear variant of MEDI proposed by Liu et al.(2013). Initially, the total field map  
343 was estimated from the complex meGRE images by performing a nonlinear least square fitting on a  
344 voxel-by-voxel basis. The resulting frequency map was then spatially unwrapped using a guided region-  
345 growing unwrapping algorithm (Xu & Cumming, 1999). The background fields, the superimposed field  
346 contributions that are not caused by the sources inside the brain and mainly generated by air-tissue  
347 interference, were eliminated using a nonparametric technique based on Projection onto Dipole Fields  
348 (PDF: Liu et al., 2011). Finally, the corrected frequency map was used as input for the field-to-source  
349 inverse problem to calculate susceptibility maps. The MEDI Toolbox  
350 (<http://weill.cornell.edu/mri/pages/qsm.html>) was used to calculate QSM images.

351 Due to the singularity of dipole kernel at the centre of k-space, the generated QSM images contain  
352 relative susceptibility values, which may not necessarily be comparable across subjects. To address this  
353 issue, a region of the corticospinal tract was selected as a zero-reference region due to its resilience to  
354 age-related degeneration (de Groot et al., 2015) and stable susceptibility across adulthood (Li et al.,  
355 2014). Using white-matter areas as reference regions has previously been recommended due to their  
356 low standard deviations of susceptibility, indicating low inter-subject variation similar (Straub et al.,  
357 2017) or even lower than CSF (Deistung et al., 2013). The process of zero-referencing is described in  
358 detail by Garzón and colleagues (2017).

359 Automated segmentation of cortical and deep gray-matter structures was performed with the  
360 Freesurfer image analysis suite — version 6 (<http://surfer.nmr.mgh.harvard.edu/>) using T1-weighted  
361 images (Fischl et al., 2002; Fischl, Salat, et al., 2004; Fischl, Van Der Kouwe, et al., 2004).

362 Next, QSM and the segmentation results were resampled to the native structural space. Then, statistics  
363 including average and standard deviation were computed on the QSM maps. We merged segmented  
364 rostral and caudal middle frontal regions from the left and right hemispheres to form DLPFC (Fig. 1A),  
365 and the left and right caudate and putamen to form striatum (supplementary materials Fig. 1A).

366 Prior to computing statistics on the QSM maps, the boundary of segmentations was eroded by one  
367 voxel, and a fraction (15%) of the most extreme values was removed to avoid the influence of high  
368 signal from neighbouring vessels and obtain more robust estimates (Garzón et al., 2017).

369 *Functional MRI analyses.* Pre-processing of the fMRI data, performed in SPM12 software, included  
370 slice-timing correction and motion correction by unwarping and re-alignment to the first image of each  
371 volume. The fMRI volumes were then normalized to a sample-specific template generated using  
372 Diffeomorphic Anatomical Registration using Exponentiated Lie algebra (DARTEL: Ashburner, 2007),  
373 affine alignment to MNI standard space, and spatial smoothing with a 6-mm full width at half maximum  
374 (FWHM) Gaussian kernel (voxel size =  $2 \times 2 \times 2 \text{ mm}^3$ ).

375 The pre-processed fMRI data were analysed with spatiotemporal PLS (McIntosh et al., 2004; McIntosh  
376 & Lobaugh, 2004) to assess the BOLD association with iron, D1DR, and age across the three  
377 experimental WM conditions (1-, 2-, and 3-back). PLS determines time-varying distributed patterns of  
378 neural activity as a function of experimental variables (1-, 2-, and 3-back) and regional iron and D1DR.  
379 This technique allows for the identification of patterns/networks, which reflect association changes  
380 across all regions of the brain simultaneously, rather than assemblies of independent regions, thus  
381 ruling out the need for multiple-comparison correction. A detailed description of spatiotemporal PLS  
382 analysis for fMRI data has been given in previous reports (Garrett et al., 2010; Grady & Garrett, 2014;  
383 Salami et al., 2010, 2012, 2014).

384 The onset of each stimulus within each block of images (1-, 2-, and 3-back) was averaged across blocks  
385 for each condition. A cross-block correlation matrix was computed as the correlation between neural  
386 activity across experimental conditions (1-, 2-, and 3-back) and variables of interest (age, D1DR, iron)

387 across different regions. Then, the correlation matrix was decomposed using singular value  
388 decomposition (SVD), to identify a set of orthogonal latent variables (LVs) representing linear  
389 combinations of the original variables:

$$390 \text{SVD}_{\text{CORR}} = \text{USV}'$$

391 This decomposition produces a left singular vector of regional susceptibility weights (U), a right singular  
392 vector of BOLD weights (V), and a diagonal matrix of singular values (S). This analysis produces  
393 orthogonal LVs that optimally represent relations between the variables of interest (age, D1DR, iron)  
394 and BOLD. Note that PLS is not mathematically susceptible to collinearity similar to the multiple  
395 regression approach (Leibovitch et al., 1999). Each LV contains a spatial pattern exhibiting the brain  
396 regions whose activity shows the strongest simultaneous relations to the input variables. To obtain a  
397 summary measure of each participant's expression of a particular LV pattern, subject-specific "brain  
398 scores" are computed by multiplying each voxel's (i) weight (V) from each LV (j) by the BOLD value in  
399 that voxel for person (m), and summing over all (n) brain voxels:

$$400 \sum_{i=1}^n v_{ij} \text{BOLD}_{im}$$

401

402 Taken together, a brain score represents the degree to which each subject contributes to the  
403 multivariate spatial pattern captured by a latent variable.

404 The statistical significance of each LV was assessed using permutation testing. This procedure involved  
405 reshuffling the rows of the data matrix and recalculating the LVs of the reshuffled matrix using the  
406 same SVD approach. The number of times a permuted singular value exceeds the original singular value  
407 yields the probability of significance of the original LV (McIntosh et al., 1996). In the present study,  
408 1000 permutations were performed. In addition, the stability of voxel saliencies contributing to each  
409 LV was determined with bootstrap estimation of standard errors (SEs), using 1000 bootstrap samples

410 (Efron & Tibshirani, 1986). The Bootstrap Ratio (BSR: the ratio between voxel saliences and estimated  
411 SEs) was computed and voxels with  $BSR > 3.29$  (similar to a Z-score of 3.29, corresponding to  $p = 0.001$ )  
412 were considered reliable. All reliable clusters comprised contiguous voxels, with a distance between  
413 clusters of at least 10 mm. Moreover, the upper and lower percentiles of the bootstrap distribution  
414 were used to generate 95% confidence intervals (CIs) around the correlation scores to facilitate  
415 interpretation (McIntosh & Lobaugh, 2004). For instance, a significant difference between correlation  
416 scores in different conditions is indicated by non-overlapping CIs. Similarly, brain or correlation scores  
417 were considered unreliable when CIs overlapped with zero.

418 PLS uses all conditions of an experiment and variables of interest at once, thus offering an additional  
419 dimension by simultaneously considering both similarities and differences across the experimental  
420 variables. If the variables of interest (i.e., age, iron content, D1DR) are similarly related to brain regions,  
421 PLS reveals a pattern with reliable loadings (with/without quantitative differences) for all variables. If  
422 a single variable dominates the pattern, PLS should reveal a reliable loading for that variable only.  
423 Alternatively, if different variables (e.g., D1DR and iron) differentially modulate BOLD response (e.g.,  
424 Load-dependent effects of dopamine on BOLD as shown in Salami et al., (2019) versus load-  
425 independent effect of iron on BOLD shown in Salami et al., 2021), PLS may reveal two distinctive  
426 networks.

#### 427 *Additional statistical analyses*

428 To assess age-effects on cognitive performance, a multivariate analysis of covariance (MANCOVA) was  
429 conducted with WM load-conditions as dependent variables and age-groups (younger vs. middle-aged  
430 vs. older) as between-subjects factors. Follow-up independent t-tests were conducted to assess  
431 significant differences between age groups. To assess the relationship between iron content and D1DR,  
432 we conducted partial correlation analyses for each region of interest with iron content and D1DR as  
433 dependent variables, controlling for age. As control analyses, we performed the same analyses but  
434 included sex, education, and regional grey-matter volume as covariates.

435

436 **Author credit statement**

437 AS and GK designed the study. JG, GK and AS performed the research. JG, GK, AS, JJ, FF, GP, MA, and  
438 BAP analysed and interpreted the data. JG, FF, GK, AS, GP, and BAP wrote the manuscript which was  
439 edited by all authors.

440 **Acknowledgement**

441 We thank the staff of the DyNAMiC project, Frida Magnusson and Emma Simonsson, staff at MRI and  
442 PET labs at Umeå University Hospital, and all our participants. We also thank Robin Pedersen for his  
443 contribution with the figures.

444 **Conflict of interest**

445 The authors declare no conflict of interest.

446 **Ethics approval**

447 This study was approved by the Regional Ethical board and the local Radiation Safety Committee in  
448 Umeå, Sweden.

449 **Data availability statement**

450 Data from the DyNAMiC project cannot be made publicly available due to ethical and legal restrictions.  
451 However, access to these original data may be available upon request from the corresponding author.

## 452 5. References

- 453 Andrews-Hanna, J. R., Snyder, A. Z., Vincent, J. L., Lustig, C., Head, D., Raichle, M. E., & Buckner, R. L.  
454 (2007). Disruption of Large-Scale Brain Systems in Advanced Aging. *Neuron*, *56*(5), 924–935.  
455 <https://doi.org/10.1016/j.neuron.2007.10.038>
- 456 Ashburner, J. (2007). A fast diffeomorphic image registration algorithm. *NeuroImage*, *38*(1), 95–113.  
457 <https://doi.org/10.1016/j.neuroimage.2007.07.007>
- 458 Bäckman, L., Ginovart, N., Dixon, R. A., Wahlin, T. B. R., Wahlin, Å., Halldin, C., & Farde, L. (2000).  
459 Age-related cognitive deficits mediated by changes in the striatal dopamine system. *American*  
460 *Journal of Psychiatry*, *157*(4), 635–637. <https://doi.org/10.1176/appi.ajp.157.4.635>
- 461 Bäckman, L., Karlsson, S., Fischer, H., Karlsson, P., Brehmer, Y., Rieckmann, A., MacDonald, S. W. S.,  
462 Farde, L., & Nyberg, L. (2011). Dopamine D1 receptors and age differences in brain activation  
463 during working memory. *Neurobiology of Aging*, *32*(10), 1849–1856.  
464 <https://doi.org/10.1016/j.neurobiolaging.2009.10.018>
- 465 Bäckman, L., Nyberg, L., Lindenberger, U., Li, S. C., & Farde, L. (2006). The correlative triad among  
466 aging, dopamine, and cognition: Current status and future prospects. *Neuroscience and*  
467 *Biobehavioral Reviews*, *30*(6), 791–807. <https://doi.org/10.1016/j.neubiorev.2006.06.005>
- 468 Cappell, K. A., Gmeindl, L., & Reuter-Lorenz, P. A. (2010). Age differences in prefrontal recruitment  
469 during verbal working memory maintenance depend on memory load. *Cortex*, *46*(4), 462–473.  
470 <https://doi.org/10.1016/j.cortex.2009.11.009>
- 471 Cass, W. A., Grondin, R., Andersen, A. H., Zhang, Z., Hardy, P. A., Hussey-Andersen, L. K., Rayens, W.  
472 S., Gerhardt, G. A., & Gash, D. M. (2007). Iron accumulation in the striatum predicts aging-  
473 related decline in motor function in rhesus monkeys. *Neurobiology of Aging*, *28*(2), 258–271.  
474 <https://doi.org/10.1016/j.neurobiolaging.2005.12.010>
- 475 Cools, R., & D’Esposito, M. (2011). Inverted-U-Shaped Dopamine Actions on Human Working  
476 Memory and Cognitive Control. *Biological Psychiatry*, *69*(12), e113–e125.  
477 <https://doi.org/https://doi.org/10.1016/j.biopsych.2011.03.028>
- 478 Daugherty, A. M., Haacke, E. M., & Raz, N. (2015). Striatal iron content predicts its shrinkage and  
479 changes in verbal working memory after two years in healthy adults. *Journal of Neuroscience*,  
480 *35*(17), 6731–6743. <https://doi.org/10.1523/JNEUROSCI.4717-14.2015>
- 481 Daugherty, A. M., & Raz, N. (2015). Appraising the Role of Iron in Brain Aging and Cognition: Promises  
482 and Limitations of MRI Methods. *Neuropsychology Review*, *25*(3), 272–287.  
483 <https://doi.org/10.1007/s11065-015-9292-y>
- 484 Daugherty, A. M., & Raz, N. (2016). Accumulation of iron in the putamen predicts its shrinkage in  
485 healthy older adults: A multi-occasion longitudinal study. *NeuroImage*, *128*(1), 11–20.  
486 <https://doi.org/10.1016/j.neuroimage.2015.12.045>
- 487 de Groot, M., Ikram, M. A., Akoudad, S., Krestin, G. P., Hofman, A., Lugt, A., Niessen, W. J., &  
488 Vernooij, M. W. (2015). Tract-specific white matter degeneration in aging: The Rotterdam  
489 Study. *Alzheimer’s & Dementia*, *11*(3), 321–330. <https://doi.org/10.1016/j.jalz.2014.06.011>
- 490 Deistung, A., Schäfer, A., Schweser, F., Biedermann, U., Turner, R., & Reichenbach, J. R. (2013).  
491 Toward in vivo histology: A comparison of quantitative susceptibility mapping (QSM) with  
492 magnitude-, phase-, and R2\*-imaging at ultra-high magnetic field strength. *NeuroImage*, *65*,  
493 299–314. <https://doi.org/10.1016/j.neuroimage.2012.09.055>
- 494 Dichtl, S., Haschka, D., Nairz, M., Seifert, M., Volani, C., Lutz, O., & Weiss, G. (2018). Dopamine

- 495 promotes cellular iron accumulation and oxidative stress responses in macrophages.  
496 *Biochemical Pharmacology*, 148, 193–201. <https://doi.org/10.1016/j.bcp.2017.12.001>
- 497 Efron, B., & Tibshirani, R. (1986). Bootstrap Methods for Standard Errors, Confidence Intervals, and  
498 Other Measures of Statistical Accuracy. *Statistical Science*, 1(1), 15–51.  
499 <https://doi.org/10.1214/ss/1177013815>
- 500 Erikson, K. M., Jones, B. C., Hess, E. J., Zhang, Q., & Beard, J. L. (2001). Iron deficiency decreases  
501 dopamine D1 and D2 receptors in rat brain. *Pharmacology Biochemistry and Behavior*, 69(3–4),  
502 409–418. [https://doi.org/10.1016/S0091-3057\(01\)00563-9](https://doi.org/10.1016/S0091-3057(01)00563-9)
- 503 Fischer, H., Nyberg, L., Karlsson, S., Karlsson, P., Brehmer, Y., Rieckmann, A., MacDonald, S. W. S.,  
504 Farde, L., & Bäckman, L. (2010). Simulating Neurocognitive Aging: Effects of a Dopaminergic  
505 Antagonist on Brain Activity During Working Memory. *Biological Psychiatry*, 67(6), 575–580.  
506 <https://doi.org/10.1016/j.biopsych.2009.12.013>
- 507 Fischl, B., Salat, D. H., Busa, E., Albert, M., Dieterich, M., Haselgrove, C., Van Der Kouwe, A., Killiany,  
508 R., Kennedy, D., Klaveness, S., Montillo, A., Makris, N., Rosen, B., & Dale, A. M. (2002). Whole  
509 brain segmentation: Automated labeling of neuroanatomical structures in the human brain.  
510 *Neuron*, 33(3), 341–355. [https://doi.org/10.1016/S0896-6273\(02\)00569-X](https://doi.org/10.1016/S0896-6273(02)00569-X)
- 511 Fischl, B., Salat, D. H., Van Der Kouwe, A. J. W., Makris, N., Ségonne, F., Quinn, B. T., & Dale, A. M.  
512 (2004). Sequence-independent segmentation of magnetic resonance images. *NeuroImage*,  
513 23(SUPPL. 1), 69–84. <https://doi.org/10.1016/j.neuroimage.2004.07.016>
- 514 Fischl, B., Van Der Kouwe, A., Destrieux, C., Halgren, E., Ségonne, F., Salat, D. H., Busa, E., Seidman, L.  
515 J., Goldstein, J., Kennedy, D., Caviness, V., Makris, N., Rosen, B., & Dale, A. M. (2004).  
516 Automatically Parcellating the Human Cerebral Cortex. *Cerebral Cortex*, 14(1), 11–22.  
517 <https://doi.org/10.1093/cercor/bhg087>
- 518 Garrett, D. D., Kovacevic, N., McIntosh, A. R., & Grady, C. L. (2010). Blood oxygen level-dependent  
519 signal variability is more than just noise. *Journal of Neuroscience*, 30(14), 4914–4921.  
520 <https://doi.org/10.1523/JNEUROSCI.5166-09.2010>
- 521 Garzón, B., Sitnikov, R., Bäckman, L., & Kalpouzos, G. (2017). Can transverse relaxation rates in deep  
522 gray matter be approximated from functional and T2-weighted FLAIR scans for relative brain  
523 iron quantification? *Magnetic Resonance Imaging*, 40, 75–82.  
524 <https://doi.org/10.1016/j.mri.2017.04.005>
- 525 Gorbach, T., Pudas, S., Lundquist, A., Orädd, G., Josefsson, M., Salami, A., de Luna, X., & Nyberg, L.  
526 (2017). Longitudinal association between hippocampus atrophy and episodic-memory decline.  
527 *Neurobiology of Aging*, 51, 167–176. <https://doi.org/10.1016/j.neurobiolaging.2016.12.002>
- 528 Grady, C. L., & Garrett, D. D. (2014). Understanding variability in the BOLD signal and why it matters  
529 for aging. *Brain Imaging and Behavior*, 8(2), 274–283. <https://doi.org/10.1007/s11682-013-9253-0>
- 530
- 531 Gustavsson, J., Papenberg, G., Falahati, F., Laukka, E. J., & Kalpouzos, G. (2022). Contributions of the  
532 Catechol-O-Methyltransferase Val158Met Polymorphism to Changes in Brain Iron Across  
533 Adulthood and Their Relationships to Working Memory. *Frontiers in Human Neuroscience*, 16.  
534 <https://doi.org/10.3389/fnhum.2022.838228>
- 535 Haider, L. (2015). Inflammation, Iron, Energy Failure, and Oxidative Stress in the Pathogenesis of  
536 Multiple Sclerosis. *Oxidative Medicine and Cellular Longevity*, 2015(3), 1–10.  
537 <https://doi.org/10.1155/2015/725370>
- 538 Hald, A., & Lotharius, J. (2005). Oxidative stress and inflammation in Parkinson’s disease: Is there a

- 539 causal link? *Experimental Neurology*, 193(2), 279–290.  
540 <https://doi.org/10.1016/j.expneurol.2005.01.013>
- 541 Hallgren, B., & Sourander, P. (1958). The Effect of Age on the Non-Haemin Iron in the Human Brain.  
542 *Journal of Neurochemistry*, 3(1), 41–51. <https://doi.org/10.1111/j.1471-4159.1958.tb12607.x>
- 543 Hare, D. J., & Double, K. L. (2016). Iron and dopamine: A toxic couple. *Brain*, 139(4), 1026–1035.  
544 <https://doi.org/10.1093/brain/aww022>
- 545 He, Y., Thong, P. S., Lee, T., Leong, S. ., Mao, B. Y., Dong, F., & Watt, F. (2003). Dopaminergic cell  
546 death precedes iron elevation in MPTP-injected monkeys. *Free Radical Biology and Medicine*,  
547 35(5), 540–547. <https://doi.org/doi.org/10.1016/j.neurobiolaging.2005.12.010>
- 548 Innis, R. B., Cunningham, V. J., Delforge, J., Fujita, M., Gjedde, A., Gunn, R. N., Holden, J., Houle, S.,  
549 Huang, S.-C., Ichise, M., Iida, H., Ito, H., Kimura, Y., Koeppe, R. A., Knudsen, G. M., Knutti, J.,  
550 Lammertsma, A. A., Laruelle, M., Logan, J., ... Carson, R. E. (2007). Consensus Nomenclature for  
551 in vivo Imaging of Reversibly Binding Radioligands. *Journal of Cerebral Blood Flow &*  
552 *Metabolism*, 27(9), 1533–1539. <https://doi.org/10.1038/sj.jcbfm.9600493>
- 553 Johansson, J., Nordin, K., Pedersen, R., Karalija, N., Papenberg, G., Andersson, M., Korkki, S. M.,  
554 Riklund, K., Guitart-Masip, M., Rieckmann, A., Bäckman, L., Nyberg, L., & Salami, A. (2022). Bi-  
555 phasic patterns of age-related differences in dopamine D1 receptors across the adult lifespan.  
556 *BioRxiv*, 1–35. <https://doi.org/10.1101/2022.05.24.493225>
- 557 Kalpouzos, G. (2018). Brain iron accumulation, and motor and cognitive decline in normal aging.  
558 *Revue de Neuropsychologie*, 10(3), 205. <https://doi.org/10.3917/rne.103.0205>
- 559 Kalpouzos, G., Garzón, B., Sitnikov, R., Heiland, C., Salami, A., Persson, J., & Bäckman, L. (2017).  
560 Higher Striatal Iron Concentration is Linked to Frontostriatal Underactivation and Poorer  
561 Memory in Normal Aging. *Cerebral Cortex*, 27(6), 3427–3436.  
562 <https://doi.org/10.1093/cercor/bhx045>
- 563 Karrer, T. M., Josef, A. K., Mata, R., Morris, E. D., & Samanez-Larkin, G. R. (2017). Reduced dopamine  
564 receptors and transporters but not synthesis capacity in normal aging adults: a meta-analysis.  
565 *Neurobiology of Aging*, 57, 36–46. <https://doi.org/10.1016/j.neurobiolaging.2017.05.006>
- 566 Kaur, D., Yantiri, F., Rajagopalan, S., Kumar, J., Mo, J. Q., Boonplueang, R., Viswanath, V., Jacobs, R.,  
567 Yang, L., Beal, M. F., DiMonte, D., Volitaskis, I., Ellerby, L., Cherny, R. A., Bush, A. I., & Andersen,  
568 J. K. (2003). Genetic or Pharmacological Iron Chelation Prevents MPTP-Induced Neurotoxicity In  
569 Vivo. *Neuron*, 37(6), 899–909. [https://doi.org/10.1016/S0896-6273\(03\)00126-0](https://doi.org/10.1016/S0896-6273(03)00126-0)
- 570 Lammertsma, A. A., & Hume, S. P. (1996). Simplified Reference Tissue Model for PET Receptor  
571 Studies. *NeuroImage*, 4(3), 153–158. <https://doi.org/10.1006/nimg.1996.0066>
- 572 Landau, S. M., Lal, R., O’Neil, J. P., Baker, S., & Jagust, W. J. (2009). Striatal dopamine and working  
573 memory. *Cerebral Cortex*, 19(2), 445–454. <https://doi.org/10.1093/cercor/bhn095>
- 574 Langkammer, C., Schweser, F., Krebs, N., Deistung, A., Goessler, W., Scheurer, E., Sommer, K.,  
575 Reishofer, G., Yen, K., Fazekas, F., Ropele, S., & Reichenbach, J. R. (2012). Quantitative  
576 susceptibility mapping (QSM) as a means to measure brain iron? A post mortem validation  
577 study. *NeuroImage*, 62(3), 1593–1599. <https://doi.org/10.1016/j.neuroimage.2012.05.049>
- 578 Larsen, B., Olafsson, V., Calabro, F., Laymon, C., Tervo-Clemmens, B., Campbell, E., Minhas, D.,  
579 Montez, D., Price, J., & Luna, B. (2020). Maturation of the human striatal dopamine system  
580 revealed by PET and quantitative MRI. *Nature Communications*, 11(1), 1–10.  
581 <https://doi.org/10.1038/s41467-020-14693-3>



- 582 Leibovitch, F. S., Black, S. E., Caldwell, C. B., McIntosh, A. R., Ehrlich, L. E., & Szalai, J. P. (1999). Brain  
583 SPECT imaging and left hemispatial neglect covaried using partial least squares: The sunnybrook  
584 stroke study. *Human Brain Mapping*, 7(4), 244–253. [https://doi.org/10.1002/\(SICI\)1097-](https://doi.org/10.1002/(SICI)1097-0193(1999)7:4<244::AID-HBM3>3.0.CO;2-K)  
585 0193(1999)7:4<244::AID-HBM3>3.0.CO;2-K
- 586 Li, W., Wu, B., Batrachenko, A., Bancroft-Wu, V., Morey, R. A., Shashi, V., Langkammer, C., De Bellis,  
587 M. D., Ropele, S., Song, A. W., & Liu, C. (2014). Differential developmental trajectories of  
588 magnetic susceptibility in human brain gray and white matter over the lifespan. *Human Brain*  
589 *Mapping*, 35(6), 2698–2713. <https://doi.org/10.1002/hbm.22360>
- 590 Lillig, C. H., Berndt, C., & Holmgren, A. (2008). Glutaredoxin systems. *Biochimica et Biophysica Acta -*  
591 *General Subjects*, 1780(11), 1304–1317. <https://doi.org/10.1016/j.bbagen.2008.06.003>
- 592 Liu, T., Liu, J., De Rochefort, L., Spincemaille, P., Khalidov, I., Ledoux, J. R., & Wang, Y. (2011).  
593 Morphology enabled dipole inversion (MEDI) from a single-angle acquisition: Comparison with  
594 COSMOS in human brain imaging. *Magnetic Resonance in Medicine*, 66(3), 777–783.  
595 <https://doi.org/10.1002/mrm.22816>
- 596 Liu, T., Wisnieff, C., Lou, M., Chen, W., Spincemaille, P., & Wang, Y. (2013). Nonlinear formulation of  
597 the magnetic field to source relationship for robust quantitative susceptibility mapping.  
598 *Magnetic Resonance in Medicine*, 69(2), 467–476. <https://doi.org/10.1002/mrm.24272>
- 599 Liu, Z., Zhai, X. R., Du, Z. S., Xu, F. F., Huang, Y., Wang, X. Q., Qiu, Y. H., & Peng, Y. P. (2021). Dopamine  
600 receptor D2 on CD4+ T cells is protective against neuroinflammation and neurodegeneration in  
601 a mouse model of Parkinson’s disease. *Brain, Behavior, and Immunity*, 98(April), 110–121.  
602 <https://doi.org/10.1016/j.bbi.2021.08.220>
- 603 Mattay, V. S., Fera, F., Tessitore, A., Hariri, A. R., Berman, K. F., Das, S., Meyer-Lindenberg, A.,  
604 Goldberg, T. E., Callicott, J. H., & Weinberger, D. R. (2006). Neurophysiological correlates of age-  
605 related changes in working memory capacity. *Neuroscience Letters*, 392(1–2), 32–37.  
606 <https://doi.org/10.1016/j.neulet.2005.09.025>
- 607 Mazhar, M., Din, A. U., Ali, H., Yang, G., Ren, W., Wang, L., Fan, X., & Yang, S. (2021). Implication of  
608 ferroptosis in aging. *Cell Death Discovery*, 7(1), 1–9. [https://doi.org/10.1038/s41420-021-](https://doi.org/10.1038/s41420-021-00553-6)  
609 00553-6
- 610 McCann, H., Cartwright, H., & Halliday, G. M. (2016). Neuropathology of  $\alpha$ -synuclein propagation and  
611 braak hypothesis. *Movement Disorders*, 31(2), 152–160. <https://doi.org/10.1002/mds.26421>
- 612 McIntosh, A. R., Bookstein, F. L., Haxby, J. V., & Grady, C. L. (1996). Spatial pattern analysis of  
613 functional brain images using partial least squares. *NeuroImage*, 3(3 I), 143–157.  
614 <https://doi.org/10.1006/nimg.1996.0016>
- 615 McIntosh, A. R., Chau, W. K., & Protzner, A. B. (2004). Spatiotemporal analysis of event-related fMRI  
616 data using partial least squares. *NeuroImage*, 23(2), 764–775.  
617 <https://doi.org/10.1016/j.neuroimage.2004.05.018>
- 618 McIntosh, A. R., & Lobaugh, N. J. (2004). Partial least squares analysis of neuroimaging data:  
619 Applications and advances. *NeuroImage*, 23(SUPPL. 1), 250–263.  
620 <https://doi.org/10.1016/j.neuroimage.2004.07.020>
- 621 Mills, E., Dong, X. P., Wang, F., & Xu, H. (2010). Mechanisms of brain iron transport: Insight into  
622 neurodegeneration and CNS disorders. *Future Medicinal Chemistry*, 2(1), 51–64.  
623 <https://doi.org/10.4155/fmc.09.140>
- 624 Nordin, K., Gorbach, T., Pedersen, R., Lundmark, V. P., Johansson, J., Andersson, M., McNulty, C.,  
625 Riklund, K., Wählin, A., Papenberg, G., Kalpouzos, G., Bäckman, L., & Salami, A. (2022).

- 626 DyNAMiC : A prospective longitudinal study of dopamine and brain connectomes : A new  
627 window into cognitive aging. *Journal of Neuroscience Research*, January, 1–25.  
628 <https://doi.org/10.1002/jnr.25039>
- 629 Nyberg, L., Andersson, M., Forsgren, L., Jakobsson-Mo, S., Larsson, A., Marklund, P., Nilsson, L. G.,  
630 Riklund, K., & Bäckman, L. (2009). Striatal dopamine D2 binding is related to frontal BOLD  
631 response during updating of long-term memory representations. *NeuroImage*, 46(4), 1194–  
632 1199. <https://doi.org/10.1016/j.neuroimage.2009.03.035>
- 633 Nyberg, L., Andersson, M., Kauppi, K., Lundquist, A., Persson, J., Pudas, S., & Nilsson, L.-G. (2014).  
634 Age-related and Genetic Modulation of Frontal Cortex Efficiency. *Journal of Cognitive*  
635 *Neuroscience*, 26(4), 746–754. [https://doi.org/10.1162/jocn\\_a\\_00521](https://doi.org/10.1162/jocn_a_00521)
- 636 Nyberg, L., Dahlin, E., Stigsdotter Neely, A., & Bäckman, L. (2009). Neural correlates of variable  
637 working memory load across adult age and skill: Dissociative patterns within the fronto-parietal  
638 network: Cognition and Neurosciences. *Scandinavian Journal of Psychology*, 50(1), 41–46.  
639 <https://doi.org/10.1111/j.1467-9450.2008.00678.x>
- 640 Ortega, R., Cloetens, P., Devès, G., Carmona, A., & Bohic, S. (2007). Iron storage within dopamine  
641 neurovesicles revealed by chemical nano-imaging. *PLoS ONE*, 2(9).  
642 <https://doi.org/10.1371/journal.pone.0000925>
- 643 Poetini, M. R., Araujo, S. M., Trindade de Paula, M., Bortolotto, V. C., Meichtry, L. B., Polet de  
644 Almeida, F., Jesse, C. R., Kunz, S. N., & Prigol, M. (2018). Hesperidin attenuates iron-induced  
645 oxidative damage and dopamine depletion in *Drosophila melanogaster* model of Parkinson's  
646 disease. *Chemico-Biological Interactions*, 279(September 2017), 177–186.  
647 <https://doi.org/10.1016/j.cbi.2017.11.018>
- 648 Reuter-Lorenz, P. A., & Cappell, K. A. (2008). Neurocognitive aging and the compensation hypothesis.  
649 *Current Directions in Psychological Science*, 17(3), 177–182. <https://doi.org/10.1111/j.1467-8721.2008.00570.x>
- 651 Rieckmann, A., Karlsson, S., Karlsson, P., Brehmer, Y., Fischer, H., Farde, L., Nyberg, L., & Bäckman, L.  
652 (2011). Dopamine D1 receptor associations within and between dopaminergic pathways in  
653 younger and elderly adults: Links to cognitive performance. *Cerebral Cortex*, 21(9), 2023–2032.  
654 <https://doi.org/10.1093/cercor/bhq266>
- 655 Rodrigue, K. M., Daugherty, A. M., Foster, C. M., & Kennedy, K. M. (2020). Striatal iron content is  
656 linked to reduced fronto-striatal brain function under working memory load. *NeuroImage*,  
657 210(October 2019), 116544. <https://doi.org/10.1016/j.neuroimage.2020.116544>
- 658 Salami, A., Avelar-Pereira, B., Garzón, B., Sitnikov, R., & Kalpouzos, G. (2018). Functional coherence of  
659 striatal resting-state networks is modulated by striatal iron content. *NeuroImage*, 183(April),  
660 495–503. <https://doi.org/10.1016/j.neuroimage.2018.08.036>
- 661 Salami, A., Eriksson, J., Kompus, K., Habib, R., Kauppi, K., & Nyberg, L. (2010). Characterizing the  
662 neural correlates of modality-specific and modality-independent accessibility and availability  
663 signals in memory using partial-least squares. *NeuroImage*, 52(2), 686–698.  
664 <https://doi.org/10.1016/j.neuroimage.2010.04.195>
- 665 Salami, A., Eriksson, J., & Nyberg, L. (2012). Opposing effects of aging on large-scale Brain systems for  
666 memory encoding and cognitive control. *Journal of Neuroscience*, 32(31), 10749–10757.  
667 <https://doi.org/10.1523/JNEUROSCI.0278-12.2012>
- 668 Salami, A., Garrett, D. D., Wåhlin, A., Rieckmann, A., Papenberg, G., Karalija, N., Jonasson, L.,  
669 Andersson, M., Axelsson, J., Johansson, J., Riklund, K., Lövdén, M., Lindenberger, U., Bäckman,

- 670 L., & Nyberg, L. (2019). Dopamine D 2/3 binding potential modulates neural signatures of  
671 working memory in a load-dependent fashion. *Journal of Neuroscience*, 39(3), 537–547.  
672 <https://doi.org/10.1523/JNEUROSCI.1493-18.2018>
- 673 Salami, A., Papenberg, G., Sitnikov, R., Laukka, E. J., Persson, J., & Kalpouzos, G. (2021). Elevated  
674 Neuroinflammation Contributes to the Deleterious Impact of Iron Overload on Brain Function in  
675 Aging. *NeuroImage*, 230(August 2020), 117792.  
676 <https://doi.org/10.1016/j.neuroimage.2021.117792>
- 677 Salami, A., Rieckmann, A., Fischer, H., & Bäckman, L. (2014). A multivariate analysis of age-related  
678 differences in functional networks supporting conflict resolution. *NeuroImage*, 86, 150–163.  
679 <https://doi.org/10.1016/j.neuroimage.2013.08.002>
- 680 Salthouse, T. (2012). Consequences of age-related cognitive declines. Annual review of psychology.  
681 *Annu Rev Psychol.*, 63, 201-226. [https://doi.org/10.1146/annurev-psych-120710-](https://doi.org/10.1146/annurev-psych-120710-100328)  
682 [100328](https://doi.org/10.1146/annurev-psych-120710-100328).Consequences
- 683 Schneider-Garces, N. J., Gordon, B. A., Brumback-Peltz, C. R., Shin, E., Lee, Y., Sutton, B. P., Maclin, E.  
684 L., Gratton, G., & Fabiani, M. (2010). Span, CRUNCH, and beyond: Working memory capacity  
685 and the aging brain. *Journal of Cognitive Neuroscience*, 22(4), 655–669.  
686 <https://doi.org/10.1162/jocn.2009.21230>
- 687 Shao, W., Zhang, S., Tang, M., Zhang, X., Zhou, Z., Yin, Y., Zhou, Q., Huang, Y., Liu, Y., Wawrousek, E.,  
688 Chen, T., Li, S., Xu, M., Zhou, J., Hu, G., & Zhou, J. (2013). Suppression of neuroinflammation by  
689 astrocytic dopamine D2 receptors via  $\alpha$ B-crystallin. *Nature*, 494, 90–94.  
690 <https://doi.org/https://doi.org/10.1038/nature11748>
- 691 Shohamy, D., & Adcock, R. A. (2010). Dopamine and adaptive memory. *Trends in Cognitive Sciences*,  
692 14(10), 464–472. <https://doi.org/10.1016/j.tics.2010.08.002>
- 693 Spence, H., McNeil, C. J., & Waiter, G. D. (2020). The impact of brain iron accumulation on cognition:  
694 A systematic review. *PLoS ONE*, 15(10 October). <https://doi.org/10.1371/journal.pone.0240697>
- 695 Steiger, T. K., Weiskopf, N., & Bunzeck, N. (2016). Iron level and myelin content in the ventral  
696 striatum predict memory performance in the aging brain. *Journal of Neuroscience*, 36(12),  
697 3552–3558. <https://doi.org/10.1523/JNEUROSCI.3617-15.2016>
- 698 Straub, S., Schneider, T. M., Emmerich, J., Freitag, M. T., Ziener, C. H., Schlemmer, H. P., Ladd, M. E.,  
699 & Laun, F. B. (2017). Suitable reference tissues for quantitative susceptibility mapping of the  
700 brain. *Magnetic Resonance in Medicine*, 78(1), 204–214. <https://doi.org/10.1002/mrm.26369>
- 701 Tabachnick, B., & Fidell, L. (2013). Using Multivariate Statistics. In *Singular Spectrum Analysis* (6th  
702 ed.). Pearson. [https://doi.org/10.1007/978-1-4757-2514-8\\_3](https://doi.org/10.1007/978-1-4757-2514-8_3)
- 703 Unger, E. L., Bianco, L. E., Jones, B. C., Allen, R. P., & Earley, C. J. (2014). Low brain iron effects and  
704 reversibility on striatal dopamine dynamics. *Experimental Neurology*, 261, 462–468.  
705 <https://doi.org/10.1016/j.expneurol.2014.06.023>
- 706 Ward, R. J., Zucca, F. A., Duyn, J. H., Crichton, R. R., & Zecca, L. (2014). The role of iron in brain ageing  
707 and neurodegenerative disorders. *The Lancet Neurology*, 13(10), 1045–1060.  
708 [https://doi.org/10.1016/S1474-4422\(14\)70117-6](https://doi.org/10.1016/S1474-4422(14)70117-6)
- 709 Xu, W., & Cumming, I. (1999). A region-growing algorithm for InSAR phase unwrapping. *IEEE*  
710 *Transactions on Geoscience and Remote Sensing*, 37(1), 124–134.  
711 <https://doi.org/10.1109/36.739143>
- 712 Yan, Y., Jiang, W., Liu, L., Wang, X., Ding, C., Tian, Z., & Zhou, R. (2015). Dopamine Controls Systemic

- 713 Inflammation through Inhibition of NLRP3 Inflammasome. *Cell*, 160(1–2), 62–73.  
714 <https://doi.org/10.1016/j.cell.2014.11.047>
- 715 Youdim, M. B. H., Ben-Shachar, D., & Riederer, P. (1993). The possible role of iron in the  
716 etiopathology of parkinson's disease. *Movement Disorders*, 8(1), 1–12.  
717 <https://doi.org/10.1002/mds.870080102>
- 718 Zecca, L., Youdim, M., Riederer, P., Connor, J. R., & Crichton, R. R. (2004). Iron, brain ageing and  
719 neurodegenerative disorders. *Nature Reviews Neuroscience*, 5(11), 863–873.  
720 <https://doi.org/10.1038/nrn1537>
- 721 Zhu, J., Hu, Z., Han, X., Wang, D., Jiang, Q., Ding, J., Xiao, M., Wang, C., Lu, M., & Hu, G. (2018).  
722 Dopamine D2 receptor restricts astrocytic NLRP3 in inflammasome activation via enhancing the  
723 interaction of  $\beta$ -arrestin2 and NLRP3. *Cell Death & Differentiation*, 25, 2037–2049.  
724 <https://doi.org/10.1038/s41418-018-0127-2>
- 725 Zimmerman, M. E., Brickman, A. M., Paul, R. H., Grieve, S. M., Tate, D. F., Gunstad, J., Cohen, R. A.,  
726 Aloia, M. S., Williams, L. M., Clark, C. R., Whitford, T. J., & Gordon, E. (2006). The relationship  
727 between frontal gray matter volume and cognition varies across the healthy adult lifespan.  
728 *American Journal of Geriatric Psychiatry*, 14(10), 823–833.  
729 <https://doi.org/10.1097/01.JGP.0000238502.40963.ac>
- 730 Zucca, F. A., Segura-Aguilar, J., Ferrari, E., Muñoz, P., Paris, I., Sulzer, D., Sarna, T., Casella, L., & Zecca,  
731 L. (2017). Interactions of iron, dopamine and neuromelanin pathways in brain aging and  
732 Parkinson's disease. *Progress in Neurobiology*, 155(3), 96–119.  
733 <https://doi.org/10.1016/j.pneurobio.2015.09.012>
- 734
